# Supplementary material for: Cannabidiol induces autophagy via ERK1/2 activation in neural cells
Source: Springer Nature journal article supplement (doi:10.1038/s41598-021-84879-2), 2021-03-08
Supplement: 41598_2021_84879_MOESM1_ESM.pdf [file 41598_2021_84879_MOESM1_ESM.pdf]

## Supplementary Table 1

| Three-way ANOVA effect                                               |  | <i>F</i> statistic | <i>df</i> | <i>p</i> -value  |
|----------------------------------------------------------------------|--|--------------------|-----------|------------------|
| CBD <i>versus</i> AM251 <i>versus</i> NH <sub>4</sub> Cl interaction |  | 8.541              | (1,40)    | <i>p</i> = 0.006 |
| CBD <i>versus</i> AM630 <i>versus</i> NH <sub>4</sub> Cl interaction |  | 3.923              | (1,32)    | <i>p</i> = 0.047 |
| CBD <i>versus</i> CPZ <i>versus</i> NH <sub>4</sub> Cl interaction   |  | 4.249              | (1,40)    | <i>p</i> = 0.045 |

  

| Pairwise comparisons (Sidak's <i>post hoc</i> test)                      |           |                                                                      |                       |
|--------------------------------------------------------------------------|-----------|----------------------------------------------------------------------|-----------------------|
| <b>CBD <i>versus</i> AM251 <i>versus</i> NH<sub>4</sub>Cl experiment</b> |           |                                                                      | <b><i>p</i>-value</b> |
| CBD 10 μM <sup>(-)</sup> / AM251 <sup>(-)</sup> / NH <sub>4</sub> Cl     | <i>vs</i> | CBD 10 μM <sup>(-)</sup> / AM251 <sup>(-)</sup> / CTR                | <i>p</i> = 0.024      |
| CBD 10 μM <sup>(+)</sup> / AM251 <sup>(-)</sup> / NH <sub>4</sub> Cl     | <i>vs</i> | CBD 10 μM <sup>(-)</sup> / AM251 <sup>(-)</sup> / NH <sub>4</sub> Cl | <i>p</i> = 0.003      |
| CBD 10 μM <sup>(+)</sup> / AM251 <sup>(-)</sup> / NH <sub>4</sub> Cl     | <i>vs</i> | CBD 10 μM <sup>(+)</sup> / AM251 <sup>(+)</sup> / NH <sub>4</sub> Cl | <i>p</i> = 0.001      |
| <b>CBD <i>versus</i> AM630 <i>versus</i> NH<sub>4</sub>Cl experiment</b> |           |                                                                      | <b><i>p</i>-value</b> |
| CBD 10 μM <sup>(-)</sup> / AM630 <sup>(-)</sup> / NH <sub>4</sub> Cl     | <i>vs</i> | CBD 10 μM <sup>(-)</sup> / AM630 <sup>(-)</sup> / CTR                | <i>p</i> = 0.018      |
| CBD 10 μM <sup>(+)</sup> / AM630 <sup>(-)</sup> / NH <sub>4</sub> Cl     | <i>vs</i> | CBD 10 μM <sup>(-)</sup> / AM630 <sup>(-)</sup> / NH <sub>4</sub> Cl | <i>p</i> < 0.001      |
| CBD 10 μM <sup>(+)</sup> / AM630 <sup>(-)</sup> / NH <sub>4</sub> Cl     | <i>vs</i> | CBD 10 μM <sup>(+)</sup> / AM630 <sup>(+)</sup> / NH <sub>4</sub> Cl | <i>p</i> < 0.001      |
| <b>CBD <i>versus</i> CPZ <i>versus</i> NH<sub>4</sub>Cl experiment</b>   |           |                                                                      | <b><i>p</i>-value</b> |
| CBD 10 μM <sup>(-)</sup> / CPZ <sup>(-)</sup> / NH <sub>4</sub> Cl       | <i>vs</i> | CBD 10 μM <sup>(-)</sup> / CPZ <sup>(-)</sup> / CTR                  | <i>p</i> < 0.001      |
| CBD 10 μM <sup>(+)</sup> / CPZ <sup>(-)</sup> / NH <sub>4</sub> Cl       | <i>vs</i> | CBD 10 μM <sup>(-)</sup> / CPZ <sup>(-)</sup> / NH <sub>4</sub> Cl   | <i>p</i> < 0.001      |
| CBD 10 μM <sup>(+)</sup> / CPZ <sup>(-)</sup> / NH <sub>4</sub> Cl       | <i>vs</i> | CBD 10 μM <sup>(+)</sup> / CPZ <sup>(+)</sup> / NH <sub>4</sub> Cl   | <i>p</i> < 0.001      |

**Table S1.** Statistical summary for CBD *versus* antagonists (AM251, AM630, CPZ) under the presence or not of NH<sub>4</sub>Cl autophagic flux blockade in SH-SY5Y cells. Three-way ANOVA followed by Sidak's *post hoc* test for pairwise comparisons; respective *F* statistic, degree of freedom (*df*), and *p*-values are indicated in the table for every hypothesis test.

## Supplementary Table 2

| Three-way ANOVA effect                                               |    | <i>F</i> statistic                                                   | <i>df</i> | <i>p</i> -value  |
|----------------------------------------------------------------------|----|----------------------------------------------------------------------|-----------|------------------|
| CBD <i>versus</i> AM251 <i>versus</i> NH <sub>4</sub> Cl interaction |    | 4,352                                                                | (1,32)    | <i>p</i> = 0.045 |
| CBD <i>versus</i> AM630 <i>versus</i> NH <sub>4</sub> Cl interaction |    | 6,674                                                                | (1,32)    | <i>p</i> = 0.015 |
| CBD <i>versus</i> CPZ <i>versus</i> NH <sub>4</sub> Cl interaction   |    | 5,498                                                                | (1,32)    | <i>p</i> = 0.025 |
| Pairwise comparisons (Sidak's <i>post hoc</i> test)                  |    |                                                                      |           |                  |
| CBD <i>versus</i> AM251 <i>versus</i> NH <sub>4</sub> Cl experiment  |    |                                                                      |           | <i>p</i> -value  |
| CBD 10 μM <sup>(-)</sup> / AM251 <sup>(-)</sup> / NH <sub>4</sub> Cl | vs | CBD 10 μM <sup>(-)</sup> / AM251 <sup>(-)</sup> / CTR                |           | <i>p</i> < 0.001 |
| CBD 10 μM <sup>(+)</sup> / AM251 <sup>(-)</sup> / NH <sub>4</sub> Cl | vs | CBD 10 μM <sup>(-)</sup> / AM251 <sup>(-)</sup> / NH <sub>4</sub> Cl |           | <i>p</i> = 0.001 |
| CBD 10 μM <sup>(+)</sup> / AM251 <sup>(-)</sup> / NH <sub>4</sub> Cl | vs | CBD 10 μM <sup>(+)</sup> / AM251 <sup>(+)</sup> / NH <sub>4</sub> Cl |           | <i>p</i> = 0.001 |
| CBD <i>versus</i> AM630 <i>versus</i> NH <sub>4</sub> Cl experiment  |    |                                                                      |           | <i>p</i> -value  |
| CBD 10 μM <sup>(-)</sup> / AM630 <sup>(-)</sup> / NH <sub>4</sub> Cl | vs | CBD 10 μM <sup>(-)</sup> / AM630 <sup>(-)</sup> / CTR                |           | <i>p</i> < 0.001 |
| CBD 10 μM <sup>(+)</sup> / AM630 <sup>(-)</sup> / NH <sub>4</sub> Cl | vs | CBD 10 μM <sup>(-)</sup> / AM630 <sup>(-)</sup> / NH <sub>4</sub> Cl |           | <i>p</i> < 0.001 |
| CBD 10 μM <sup>(+)</sup> / AM630 <sup>(-)</sup> / NH <sub>4</sub> Cl | vs | CBD 10 μM <sup>(+)</sup> / AM630 <sup>(+)</sup> / NH <sub>4</sub> Cl |           | <i>p</i> < 0.001 |
| CBD <i>versus</i> CPZ <i>versus</i> NH <sub>4</sub> Cl experiment    |    |                                                                      |           | <i>p</i> -value  |
| CBD 10 μM <sup>(-)</sup> / CPZ <sup>(-)</sup> / NH <sub>4</sub> Cl   | vs | CBD 10 μM <sup>(-)</sup> / CPZ <sup>(-)</sup> / CTR                  |           | <i>p</i> = 0.002 |
| CBD 10 μM <sup>(+)</sup> / CPZ <sup>(-)</sup> / NH <sub>4</sub> Cl   | vs | CBD 10 μM <sup>(-)</sup> / CPZ <sup>(-)</sup> / NH <sub>4</sub> Cl   |           | <i>p</i> = 0.001 |
| CBD 10 μM <sup>(+)</sup> / CPZ <sup>(-)</sup> / NH <sub>4</sub> Cl   | vs | CBD 10 μM <sup>(+)</sup> / CPZ <sup>(+)</sup> / NH <sub>4</sub> Cl   |           | <i>p</i> = 0.001 |

**Table S2.** Statistical summary for CBD *versus* antagonists (AM251, AM630, CPZ) under the presence or not of NH<sub>4</sub>Cl autophagic flux blockade in immortalized astrocytes cells. Three-way ANOVA followed by Sidak's *post hoc* test for pairwise comparisons; respective *F* statistic, degree of freedom (*df*), and *p*-values are indicated in the table for every hypothesis test.
